# Supplementary material for: In Silico Genomic and Metabolic Atlas of Limosilactobacillus reuteri DSM 20016: An Insight into Human Health
Source: MDPI journal article supplement (doi:10.3390/microorganisms10071341), 2022-07-02
Supplement: s1 [file s1]

**Table S1.** Gene table showing all 200 genes identified within the genome. Included are their proposed functions and gene names, organised into their functional pathway groups.

| Functions                                | Sub-group                   | Gene name                                                                             | Locus                  | Function of gene                                                                                                                        |
|------------------------------------------|-----------------------------|---------------------------------------------------------------------------------------|------------------------|-----------------------------------------------------------------------------------------------------------------------------------------|
| Propionate metabolism                    | Propionate metabolism       | Glycerol 2-dehydrogenase                                                              | Lreu_1840              | Converts hydroxy-acetone to 1,2 Propanediol (1,2-PD).                                                                                   |
|                                          |                             | 1,3-propanediol dehydrogenase (EC:1.1.1.202) - iron-containing alcohol dehydrogenase. | Lreu_0030              | Conversion of propionaldehyde to propan-1-ol alongside PduQ.                                                                            |
|                                          |                             | Acetate kinase                                                                        | Lreu_0560<br>Lreu_1733 | Converts propionyl-P/propionyl PO <sub>4</sub> (2-) to propionate.                                                                      |
|                                          |                             | 1-propanol dehydrogenase - PduQ                                                       | Lreu_1734              | Converts propanal/propionaldehyde to propan-1-ol.                                                                                       |
|                                          |                             | Propionaldehyde dehydrogenase (EC:1.2.1.87)                                           | Lreu_1735              | Converts propionaldehyde to propionyl-CoA.                                                                                              |
|                                          | Cobalamin related           | Propanediol utilisation protein - phosphate propanoyl transferase (EC:2.3.1.222) PduL | Lreu_1740              | Propionyl-CoA to propionyl-PO <sub>4</sub> (2-).                                                                                        |
|                                          |                             | ATP:cob(I)alamin adenosyltransferase - PduS                                           | Lreu_1736              | Involved in cobalamin biosynthesis.                                                                                                     |
|                                          |                             | Cob(I)alamin adenosyltransferase (EC:2.5.1.17) PduO                                   | Lreu_1737              | Converts certain substances in coenzyme B12.                                                                                            |
|                                          |                             | Hypothetical protein - PduH                                                           | Lreu_1743              | Gene fused to PduG, small subunit.                                                                                                      |
|                                          | Reuterin/propionate         | Diol/glycerol dehydratase reactivating factor, large subunit - PduG                   | Lreu_1744              | Codes for glycerol dehydratase activase, replacing inactive cobalamin in glycerol dehydratase.                                          |
|                                          |                             | Glycerol dehydratase - small subunit PduE                                             | Lreu_1745              | Involved in the 1,2-PD to propionaldehyde degradation pathway to propionate. These three subunits form the glycerol dehydratase enzyme. |
|                                          |                             | Glycerol dehydratase - medium subunit PduD                                            | Lreu_1746              |                                                                                                                                         |
|                                          |                             | Glycerol dehydratase - large subunit PduC                                             | Lreu_1747              |                                                                                                                                         |
| Bacterial Microcompartment protein (BMC) | Pdu operon shell components | Ethanolamine utilisation protein EutP                                                 | Lreu_1728              | BMC related.                                                                                                                            |
|                                          |                             | Ethanolamine utilisation protein EutS                                                 | Lreu_1732              | Microcompartment related.                                                                                                               |
|                                          |                             | Ethanolamine utilisation protein EutN                                                 | Lreu_1738              | Microcompartment related.                                                                                                               |

|                                   |                           |                                                                                         |                   |                                                                                                                      |
|-----------------------------------|---------------------------|-----------------------------------------------------------------------------------------|-------------------|----------------------------------------------------------------------------------------------------------------------|
|                                   |                           | Hypothetical protein - propanediol utilisation protein PduM                             | Lreu_1739         | Microcompartment related.                                                                                            |
|                                   |                           | Microcompartments protein PduJ                                                          | Lreu_1741         | Similar to PduA, but missing central pore mechanism.                                                                 |
|                                   |                           | Microcompartments protein PduK                                                          | Lreu_1742         | A non-integral microcompartment organisation protein.                                                                |
|                                   |                           | Microcompartment protein PduB                                                           | Lreu_1748         | Binds the MCP protein shell to the enzymatic core.                                                                   |
|                                   |                           | Microcompartment protein PduA/EutM                                                      | Lreu_1749         | Prevents cell growth arrest, forming the central pore.                                                               |
|                                   |                           | Ethanolamine utilisation protein EutJ                                                   | Lreu_1751         | BMC related.                                                                                                         |
| Cobalamin synthesis/ B12 coenzyme | Cobalt transport          | CbiQ                                                                                    | Lreu_1707         | An ABC transporter involved in the transportation of cobalt.                                                         |
|                                   |                           | CbiO                                                                                    | Lreu_1706         |                                                                                                                      |
|                                   |                           | CbiN                                                                                    | Lreu_1708         |                                                                                                                      |
|                                   |                           | CbiM                                                                                    | Lreu_1709         |                                                                                                                      |
|                                   | Synthesis of B12 coenzyme | Glutamyl-tRNA reductase (EC:1.2.1.70)                                                   | Lreu_1703<br>HemA | Coenzyme originates from L-glutamate/L-glutamyl-tRNA (glu). Converts glu to glutamate 1-semialdehyde.                |
|                                   |                           | Glutamate-1-semialdehyde 2,1-aminomutase (EC:5.4.3.8)                                   | Lreu_1700<br>HemL | Converts glutamate-1-semialdehyde to 5-aminolevulinate.                                                              |
|                                   |                           | Porphobilinogen synthase (EC:4.2.1.24)                                                  | Lreu_1701<br>HemB | Converts 5-aminolevulinate to porphobilinogen.                                                                       |
|                                   |                           | Hydroxymethylbilane synthase (EC:2.5.1.61)                                              | Lreu_1702<br>HemC | Converts porphobilinogen to hydroxymethyl-bilane.                                                                    |
|                                   |                           | Uroporphyrinogen III methyltransferase / synthase (EC:2.1.1.107; 4.2.1.75)<br>HemD/CobA | Lreu_1712         | Converts hydroxymethyl-bilance to uroporphyrinogen III.                                                              |
|                                   |                           | Precorrin-2 dehydrogenase / sirohydrochlorin ferrochelatase (EC:1.3.1.76; 4.99.1.4)     | Lreu_1704<br>CysG | Converts uroporphyrinogen III to Precorrin 2. Undergoes anaerobic pathway, converts precorrin 2 to sirohydrochlorin. |
|                                   |                           | Sirohydrochlorin cobaltochelatase (EC:4.99.1.3)                                         | Lreu_1711<br>CbiK | Cobalt is added within this step, converting sirohydrochlorin to co-sirohydrochlorin.                                |

|                                                                                             |                                     |                                                                                                                                 |
|---------------------------------------------------------------------------------------------|-------------------------------------|---------------------------------------------------------------------------------------------------------------------------------|
| Precorrin-2/cobalt-factor-2 C20-methyltransferase (EC:2.1.1.130; 2.1.1.151)                 | Lreu_1710<br>CbiL                   | Converts co-sirohydrochlorin to co-factor 3.                                                                                    |
| Precorrin-3B C17-methyltransferase (EC:2.1.1.131)                                           | Lreu_1714<br>CbiH                   | Converts co-precorrin 3 to co-precorrin 4.                                                                                      |
| Precorrin-4/cobalt-precorrin-4 C11-methyltransferase (EC:2.1.1.133; 2.1.1.271)              | Lreu_1716<br>CbiF                   | Converts co-precorrin 4 to co-precorrin 5A.                                                                                     |
| Cobalt-precorrin 5A hydrolase (EC:3.7.1.12)                                                 | Lreu_1715<br>CbiG                   | Converts co-precorrin 5A to co-precorrin 5B.                                                                                    |
| Cobalt-precorrin-5B (C1)-methyltransferase (EC:2.1.1.195)                                   | Lreu_1719<br>CbiD                   | Converts co-precorrin 5B to co-precorrin 6A.                                                                                    |
| Precorrin-6A/cobalt-precorrin-6A reductase (EC:1.3.1.54; 1.3.1.106)                         | Lreu_1713<br>CbiJ                   | Converts co-precorrin 6A to co-precorrin 6B.                                                                                    |
| Cobalt-precorrin-6B (C15)-methyltransferase (EC:2.1.1.196)                                  | Lreu_1717<br>CbiT                   | Converts co-precorrin 6B to co-precorrin 7.                                                                                     |
| Cobalt-precorrin-7 (C5)-methyltransferase (EC:2.1.1.289)                                    | Lreu_1718<br>CbiE                   | Converts co-precorrin 7 to co-precorrin 8X.                                                                                     |
| Precorrin-8X/cobalt-precorrin-8 methylmutase (EC:5.4.99.61; 5.4.99.60)                      | Lreu_1720<br>CbiC                   | Converts co-precorrin 8X to cobyrinate.                                                                                         |
| Cobyrinic acid a,c-diamide synthase (EC:6.3.5.9; 6.3.5.11)                                  | Lreu_1722<br>CbiA                   | Converts cobyrinate to cob(II)yrinate a,c diamide.                                                                              |
| Cob(I)alamin adenosyltransferase (EC:2.5.1.17)                                              | Lreu_1725<br>Lreu_1737<br>PduO/CobO | Converts cob(II)yrinate to adenosyl cobyrinate a,c diamide.<br>Also adds vitamin B12s to coenzyme.                              |
| Adenosyl Cobyric acid synthase (EC:6.3.5.10)                                                | Lreu_1705<br>CobQ                   | Converts adenosyl cobyrinate a,c diamide to adenosyl cobyrinate hexaamide.                                                      |
| Adenosyl Cobinamide-phosphate synthase (EC:6.3.1.10)                                        | Lreu_1721<br>CbiB                   | Converts adenosyl cobyrinate hexaamide to adenosyl cobinamide.                                                                  |
| L-threonine O-3-phosphate decarboxylase (EC:4.1.1.81))                                      | Lreu_1723                           | Converts L-Threonine phosphate to (R)-1-Aminopropan-2-yl phosphate for use in (EC:6.3.1.10) with Adenosyl cobyrinate hexaamide. |
| Adenosylcobinamide kinase / adenosylcobinamide-phosphate guanylyltransferase (EC:2.7.1.156) | Lreu_1699<br>CobU                   | Converts adenosyl cobinamide to adenosyl cobinamide phosphate then                                                              |

|                      |                        |                                                                                      |                                                  |                                                                                                            |
|----------------------|------------------------|--------------------------------------------------------------------------------------|--------------------------------------------------|------------------------------------------------------------------------------------------------------------|
| 2.7.7.62)            |                        |                                                                                      |                                                  | to adenosine-GDP-cobinamide.                                                                               |
|                      |                        | Nicotinate-nucleotide--dimethylbenzimidazole phosphoribosyltransferase (EC:2.4.2.21) | Lreu_1695<br>CobT                                | Converts dimethylbenzimidazole to a-Ribazole-5'-P.                                                         |
|                      |                        | Alpha-ribazole phosphatase (EC:3.1.3.73)                                             | Lreu_1697<br>CobC                                | Converts a-ribazole-5'-P to a-ribazole.                                                                    |
|                      |                        | Adenosyl cobinamide-GDP ribazole transferase (EC:2.7.8.26)                           | Lreu_1698<br>CobS                                | Converts a-ribazole and adenosine-GDP-cobinamide to vitamin B12 coenzyme.                                  |
| Pdu Operon Regulator |                        | Transcriptional regulator, AraC family, two-component system, response regulator     | Lreu_1750                                        | Pdu operon encoder, from Lreu_1695 to Lreu_1752, for B12 biosynthesis, propionate and reuterin production. |
| Sugar uptake         | Glucose uptake         | Glucose uptake protein                                                               | Lreu_0031<br>Lreu_0418                           | Glucose intake.                                                                                            |
|                      | Glycerol uptake        | Glycerol uptake facilitator protein                                                  | Lreu_1752                                        | Responsible for glycerol movement.                                                                         |
|                      |                        | Glycerol kinase                                                                      | Lreu_1065<br>GlpK                                | Involved in glycerol uptake and metabolism.                                                                |
| Pyruvate synthesis   | D-lactate              | D-lactate dehydrogenase (EC:1.1.1.28)                                                | Lreu_0043<br>Lreu_0683<br>Lreu_1631<br>Lreu_1692 | Converts D-lactate to pyruvate.                                                                            |
| Histamine production | Histamine biosynthesis | Hypothetical protein - HdcB                                                          | Lreu_1831                                        | Converts L-histidine to biogenic amine histamine through the hdc gene cluster.                             |
|                      |                        | Histidine carboxylase, pyruvoyl type (EC:4.1.1.22) - HdcA                            | Lreu_1832                                        |                                                                                                            |
|                      |                        | Arginine:ornithine antiporter/lysine permease - HdcP                                 | Lreu_1833                                        |                                                                                                            |
| Glycolysis           | Glucose -> Pyruvate    | Fructokinase/ glucokinase (FK) (EC:2.7.1.2)                                          | Lreu_1206                                        | . Converts glucose to glucose-6-P.                                                                         |
|                      |                        | Glucose-6-phosphate isomerase (PGI) (EC:5.3.1.9)                                     | Lreu_0420                                        | Converts glucose-6-P to fructose-6-P.                                                                      |
|                      |                        | Fructose-bis-phosphate aldolase (FBA) (EC:4.1.2.13)                                  | Lreu_0238                                        | Converts fructose-1,6-BP to glyceraldehyde-3-P and dihydroxyacetone-P.                                     |
|                      |                        | Triosephosphate isomerase (tpiA) (EC:5.3.1.1)                                        | Lreu_0171<br>Lreu_0237                           | Converts glyceraldehyde-3P to dihydroxyacetone-P                                                           |

|                           |                    |                                                                                      |                                     |                                                                                                      |
|---------------------------|--------------------|--------------------------------------------------------------------------------------|-------------------------------------|------------------------------------------------------------------------------------------------------|
|                           |                    |                                                                                      |                                     | (glycerone-P) and vice versa.                                                                        |
|                           |                    | Phosphoglycerate mutase (EC:5.4.2.11)                                                | Lreu_0146<br>Lreu_0291              | Converts glycerate-3P to glycerate-2P.                                                               |
|                           |                    | Pyruvate kinase (EC:2.7.1.40)                                                        | Lreu_0751<br>Lreu_0457<br>Lreu_1324 | Converts phosphoenolpyruvate to pyruvate by transferring a phosphate group.                          |
|                           |                    | Phosphocarrier protein HPr                                                           | Lreu_1325                           | Involved in the phosphotransferase system in forming pyruvate.                                       |
|                           |                    | Glucose-6-phosphate 1-dehydrogenase                                                  | Lreu_1765                           | Converts a-D-glucose-6P to D-gluco-1,5-lactone-6P.                                                   |
|                           |                    | 6-phosphogluconolactonase (EC:3.1.1.31)                                              | Lreu_0578                           | Converts D-gluco-1,5-lactone-6P to D-gluconate-6P.                                                   |
|                           |                    | 6-phosphogluconate dehydrogenase (EC:1.1.1.44)(EC:1.1.1.343)                         | Lreu_1766                           | Converts D-gluconate-6P to D-ribulose-5P.                                                            |
|                           |                    | Ribulose-phosphate dehydrogenase (EC:5.1.3.1)                                        | Lreu_1167                           | Converts D-ribulose-5P to D-xylulose-5P.                                                             |
|                           |                    | Xylulose-5-phosphate/ fructose-6-phosphate phosphoketolase (EC:4.1.2.9)(EC:4.1.2.22) | Lreu_1686                           | Converts D-xylulose-5P to D-glyceraldehyde-3P.                                                       |
|                           | Glucose conversion | Aldose 1-epimerase (EC:5.1.3.3)                                                      | Lreu_1538                           | Converts $\alpha$ -D-glucose to $\beta$ -D-glucose and vice versa.                                   |
|                           |                    | Phosphoglucomutase (EC:5.4.2.2)                                                      | Lreu_0380                           | $\alpha$ -D-glucose-1P conversion to $\alpha$ -D-glucose-6P and vice versa.                          |
| Adhesion/<br>Colonisation | Sugars             | Alpha glucosidase (EC:3.2.1.20)                                                      | Lreu_1017                           | Converts sucrose to D-fructose and D-glucose. Also catalyses the conversion of maltose to D-glucose. |
|                           |                    | Sucrose phosphorylase (EC:2.4.1.7)                                                   | Lreu_1542                           | GtfA, an essential protein for sucrose-dependent autoaggregation for biofilm formation.              |
|                           | Surface proteins   | 5 peptide-methionine (R) -S-oxide reductase (EC:1.8.4.12) MsrB                       | Lreu_0188                           | Msr reverses the loss of biological activity of proteins due to methionine sulfoxide oxidation.      |

|                         |                      |                                                             |                        |                                                                                                                                  |
|-------------------------|----------------------|-------------------------------------------------------------|------------------------|----------------------------------------------------------------------------------------------------------------------------------|
|                         |                      | Peptide-methionine (S)-S-oxide reductase (EC:1.8.4.11) MsrA | Lreu_1198              | ABC transporters that are involved in cystine transport.                                                                         |
| Mucus adhesion          |                      | L-cystine transport system substrate-binding protein        | Lreu_0296              | ATP binding protein involved in cystine transport.                                                                               |
|                         |                      | L-cystine transport system ATP-binding protein              | Lreu_0295              | Putative transmembrane protein.                                                                                                  |
|                         |                      | L-cystine transport system ATP-binding protein              | Lreu_0294              | Cystathionine gamma-lyase.                                                                                                       |
|                         |                      | L-cystine transport system permease protein                 | Lreu_0293              | Elongation factor that influences ribosome binding.                                                                              |
|                         |                      | Ef-Tu                                                       | Lreu_0651              | Heat-shock protein - chaperonin family.                                                                                          |
|                         |                      | GroEL                                                       | Lreu_0354              | A sortase that modifies surface proteins.                                                                                        |
|                         |                      | Sortase A (EC:3.4.22.70)                                    | Lreu_0234              | Fibronectin and fibrinogen binding domains.                                                                                      |
| Enzyme                  |                      | Fibronectin-binding A domain protein                        | Lreu_0932              | LPXTG motif and YSIRK motif found on some surface proteins.                                                                      |
| Fibronectin             |                      | Fibronectin-binding protein B (LPXTG motif)                 | Lreu_1258              |                                                                                                                                  |
|                         |                      | YSIRK peptide                                               | Lreu_1259              |                                                                                                                                  |
| Cell wall               |                      | DltD                                                        | Lreu_0249              | Dlt operon catalyses the addition of D-alanine residues to lipoteichoic acids in the cell wall. Responsible for cAMP resistance. |
|                         |                      | DltC                                                        | Lreu_0250              |                                                                                                                                  |
|                         |                      | DltB                                                        | Lreu_0251              |                                                                                                                                  |
|                         |                      | DltA                                                        | Lreu_0252              |                                                                                                                                  |
| Short chain fatty acids | Butanoate metabolism | FabII-PI cluster                                            |                        |                                                                                                                                  |
|                         |                      | Holo-(acyl-carrier-protein) synthase (AcpS)                 | Lreu_0254              | Converts apo-ACP to holo-ACP (EC:2.8.7.8). Responsible for acyl activation for fatty acid biosynthesis.                          |
|                         |                      | Holo-(carrier-protein)                                      | Lreu_1160<br>Lreu_0990 | Utilised by AcpS as a receiver of 4'-PP from coenzyme A.                                                                         |

|                    |                                                         |                                                                            |                                                                                                           |
|--------------------|---------------------------------------------------------|----------------------------------------------------------------------------|-----------------------------------------------------------------------------------------------------------|
|                    | Malonyl-CoA-ACP transacylase (FabD)                     | Lreu_0989                                                                  | Converts malonyl-CoA + holo-ACP to malonyl-ACP.                                                           |
|                    | 3-oxoacyl-ACP synthase III (FabH)                       | Lreu_0991                                                                  | Converts acetyl-CoA + malonyl-ACP to B-ketoacyl-ACP, produces CO <sub>2</sub> and H-S-ACP (EC:2.3.1.180). |
|                    | 3-oxoacyl-ACP synthase II (FabF)                        | Lreu_0987                                                                  | Converts malonyl-ACP + acyl-ACP to B-ketoacyl-ACP, produces CO <sub>2</sub> and H-S-ACP (EC:2.3.1.179).   |
|                    | 3-oxoacyl-ACP reductase (FabG)                          | Lreu_0988                                                                  | Converts B-ketoacyl-ACP + NADPH + H <sup>+</sup> to B-hydroxyacyl-ACP + NADH <sup>+</sup> (EC:1.1.1.100). |
|                    | 3-hydroxyacyl-(acyl-carrier-protein) dehydratase (FabZ) | Lreu_0993<br>Lreu_0985                                                     | Converts B-hydroxyacyl-ACP to trans 2-enoyl-ACP + H <sub>2</sub> O (EC:4.2.1.59).                         |
|                    | Enoyl-ACP reductase (FabI)                              | Lreu_0981                                                                  | Converts trans 2-enoyl-ACP + NADPH + H <sup>+</sup> to Acyl-ACP (1.3.1.9).                                |
|                    | Acyl-ACP thioesterase                                   | Lreu_0335                                                                  | Converts acyl-ACP to butyric acid and other FAs (EC:3.1.2.14/ 3.1.2.21)                                   |
|                    | Transcriptional regulator, MarR family (FabT)           | Lreu_0992                                                                  | Repressor of the FabII operon.                                                                            |
|                    | Acyl-CoA Hydrolase (TesB)                               | Lreu_0379                                                                  | A thioesterase converting acyl-CoA + H <sub>2</sub> O into CoA + carboxylate.                             |
|                    | <i>Butanoate metabolism</i>                             |                                                                            |                                                                                                           |
|                    | Thiolase/Acetyl-CoA acetyltransferase (EC:2.3.1.9)      | Lreu_0052                                                                  | Converts 2acetyl-CoA to acetoacetyl-CoA + CoA                                                             |
|                    | 3-hydroxyacyl-CoA dehydrogenase (EC:1.1.1.157)          | Lreu_0103                                                                  | Converts acetoacetyl-CoA to 3-hydroxybutyryl-CoA                                                          |
|                    | 4-hydroxybutyryl-CoA dehydratase/Crotonase (EC:4.2.1.7  | Lreu_0887                                                                  | Converts 3-hydroxybutyryl-CoA to crotonyl-CoA                                                             |
|                    | Cronoyl-CoA dehydrogenase                               | -                                                                          | Converts crotonyl-CoA to butyryl-CoA (EC:1.3.1.86).                                                       |
| Lactate metabolism | L-lactate/Malate dehydrogenase (NAD) (EC:1.1.1.27       | Lreu_0194<br>Lreu_0716<br>Lreu_0907<br>Lreu_1272<br>Lreu_1394<br>Lreu_1903 | Converts pyruvate to L-lactate.                                                                           |

|                          |        |                                                                                |                        |                                                                                                                                               |
|--------------------------|--------|--------------------------------------------------------------------------------|------------------------|-----------------------------------------------------------------------------------------------------------------------------------------------|
|                          |        | Malolactic enzyme - malate dehydrogenase (EC:4.1.1.101)                        | Lreu_1532              | Converts malate to L-lactate.                                                                                                                 |
| Acetate                  |        | Acetate kinase (AckA) (EC:2.7.2.1)<br>PduQ                                     | Lreu_0560<br>Lreu_1733 | A kinase involved in the phosphate acetyltransferase pathway, that localises with pduQ to convert acetyl-phosphate to acetate and vice versa. |
|                          |        | Phosphate acetyltransferase (EC:2.3.1.8)                                       | Lreu_0398              | Converts acetyl-CoA to acetyl-P and vice versa.                                                                                               |
|                          |        | Pyruvate dehydrogenase E1 component alpha subunit (EC:1.2.4.1)                 | Lreu_0631              | Converts pyruvate to 2-hydroxy-ethyl-ThPP and then further converts to S-acetyl dihydrolipoamide-E.                                           |
|                          |        | Pyruvate dehydrogenase E1 component beta subunit (EC:1.2.4.1)                  | Lreu_0632              | Requires coenzyme A and Lipoate for further conversion.                                                                                       |
|                          |        | Pyruvate dehydrogenase E2 (dihydrolipoamide acetyltransferase) (EC:2.3.1.12)   | Lreu_0633              | Requires FAD and NAD+ to convert S-acetyl dihydrolipoamide-E to acetyl-CoA.                                                                   |
|                          |        | Dihydrolipoamide dehydrogenase (EC:1.8.1.4)                                    | Lreu_0634              | Binds to core acetyltransferase in pyruvate dehydrogenase and begins the process of oxidation of dihydrolipoyl groups.                        |
|                          |        | Lipoate-protein ligase                                                         | Lreu_1677              | Converts (R)-Lipoate to (GcvH)-N6-lipoyl-L-lysine and then further to (E2 protein)-N6-lipoyl-L-lysine.                                        |
| Amino acids and vitamins | Folate | 7,8-dihydroneopterin aldolase/epimerase/oxygenase (EC:5.1.99.8)(EC:4.1.2.25)   | Lreu_1280              | Converts 7,8-Dihydroneopterin to 7,8-Dihydroneopterin then further to 6-hydroxymethyl-7,8-dihydropterin and glycolaldehyde.                   |
|                          |        | 2-amino-4-hydroxy-6-hydroxymethyldihydropteridine diphosphokinase (EC:2.7.6.3) | Lreu_1279              | Converts 6-hydroxymethyl-7,8-dihydropterin to 6-hydroxymethyl-7,8-dihydropterin-P2.                                                           |
|                          |        | Dihydropteroate synthase (EC:2.5.1.15)                                         | Lreu_1275              | Converts 4-aminobenzoate and 6-hydroxymethyl-7,8-dihydropterin or 6-                                                                          |



|          |                                                                               |                        |                                                                                                                                                                                                 |
|----------|-------------------------------------------------------------------------------|------------------------|-------------------------------------------------------------------------------------------------------------------------------------------------------------------------------------------------|
|          |                                                                               |                        | hydroxymethyl-7,8-dihydropterin-P2 to 7,8-dihydrofolate (DHF).                                                                                                                                  |
|          | Dihydrofolate reductase (EC:1.5.1.3)                                          | Lreu_0770              | Catalyses numerous reactions between folate and 5,6,7,8-tetrahydrofolate (THF) and 7,8-dihydrofolate (DHF)                                                                                      |
|          | Dihydrofolate synthase/folylpolyglutamate synthase (EC:6.3.2.12)(EC:6.3.2.17) | Lreu_1277              | Converts 7,8-dihydropteroate to 7,8-dihydrofolate (DHF) and THF-polyglutamate to THF-L-glutamate then to 5,6,7,8-tetrahydrofolate (THF).                                                        |
|          | FolC bifunctional protein                                                     | Lreu_0510              | Converts 7,8-dihydropteroate to 7,8-dihydrofolate (DHF), then 5,6,7,8-tetrahydrofolate (THF) to THF-L-glutamate and then THF-polyglutamate.                                                     |
| Biotin   | Carboxyl transferase subunit a (AccA)                                         | Lreu_0982              | Converts acetyl-CoA to malonyl-CoA with ATP (EC:6.4.1.2).                                                                                                                                       |
|          | Biotin carboxyl carrier protein (AccB)                                        | Lreu_0986              |                                                                                                                                                                                                 |
|          | Biotin carboxylase subunit (AccC)                                             | Lreu_0984              |                                                                                                                                                                                                 |
|          | Carboxyl transferase subunit B (AccD)                                         | Lreu_0983              |                                                                                                                                                                                                 |
|          | BioY                                                                          | Lreu_0733              | Biotin transport proteins.                                                                                                                                                                      |
|          | EcfT                                                                          | Lreu_1453              |                                                                                                                                                                                                 |
|          |                                                                               | Lreu_1663              |                                                                                                                                                                                                 |
|          | EcfA1                                                                         | Lreu_1455              |                                                                                                                                                                                                 |
|          | EcfA2                                                                         | Lreu_1454              |                                                                                                                                                                                                 |
|          | Energy-coupling factor transport system                                       | Lreu_1662<br>Lreu_1661 |                                                                                                                                                                                                 |
|          | Biotin--acetyl-CoA-carboxylase ligase                                         | Lreu_0734              | BirA family transcriptional regulator. Activates biotin and transfers the biotin moiety.                                                                                                        |
| Thiamine | Thiamine-phosphate pyrophosphorylase (EC:2.5.1.3)                             | Lreu_1015              | Converts 4-amino-5-hydroxymethyl-2-methylpyrimidine diphosphate and 2-(2-carboxy-4-methyl-thiazol-5-yl) ethyl phosphate or 5-(2-hydroxyethyl)-4-methylthiazole phosphate to Thiamine phosphate. |

|            |                                                                                                 |                        |                                                                                                                                                       |
|------------|-------------------------------------------------------------------------------------------------|------------------------|-------------------------------------------------------------------------------------------------------------------------------------------------------|
|            | Thiamine phosphate phosphatase<br>(EC:3.1.3.100)                                                | Lreu_1168              | Converts thiamine phosphate to either thiamine or thiamine diphosphate/pyrophosphate (TPP).                                                           |
|            | Phosphomethylpyrimidine kinase<br>(EC:2.7.1.49 2.7.4.7)                                         | Lreu_1014<br>Lreu_1271 | Converts 4-amino-5-hydroxymethyl-2-methylpyrimidine to 4-amino-5-hydroxymethyl-2-methylpyrimidine diphosphate.                                        |
|            | Hydroxyethylthiazole kinase<br>(EC:2.7.1.50)                                                    | Lreu_1013              | Converts 5-(2-hydroxyethyl)-4-methylthiazole to 5-(2-hydroxyethyl)-4-methylthiazole phosphate.                                                        |
| Riboflavin | 3,4-dihydroxy 2-butanone 4-phosphate synthase<br>(EC:3.5.4.25) (EC:4.1.99.12)                   | Lreu_0880              | Converts GTP to 2,5-Diamino-6-(5-phospho-D-ribosyl amino)-pyrimidin-4(3H)-one. Converts Ribulose 5-phosphate to 3,4-Dihydroxy-2-butanone 4-phosphate. |
|            | Diamino-hydroxyphosphoribosylaminopyrimidine deaminase<br>(EC:3.5.4.26) (EC:1.1.1.193)          | Lreu_0878              | Converts 2,5-Diamino-6-(5-phospho-D-ribosyl amino)-pyrimidin-4(3H)-one to 5-Amino-6(5-phospho-D-ribityl amino)uracil.                                 |
|            | 5-amino-6-(5-phospho-D-ribityl amino) uracil phosphatase<br>(EC:3.1.3.104)                      | Lreu_0900              | Converts 5-Amino-6(5-phospho-D-ribityl amino)uracil to 5-Amino-6-(ribityl-amino)uracil.                                                               |
|            | 6,7-dimethyl-8-ribityllumazine synthase<br>(EC:2.5.1.78)                                        | Lreu_0881              | Converts 5-Amino-6-(ribityl-amino)uracil and 3,4-Dihydroxy-2-butanone 4-phosphate to 6,7-Dimethyl-8-ribityllumazine.                                  |
|            | Riboflavin synthase<br>(EC:2.5.1.9)                                                             | Lreu_0879              | Converts 6,7-Dimethyl-8-ribityllumazine to Riboflavin.                                                                                                |
|            | Riboflavin kinase<br>(EC:2.7.1.25)(EC:2.7.7.2)                                                  | Lreu_0702              | Converts Riboflavin to FMN and/or FAD.                                                                                                                |
| Niacin     | Transcriptional regulator, DeoR family<br>Nicotinate phosphoribosyltransferase<br>(EC:6.3.4.21) | Lreu_0115              | Converts Nicotinate to Nicotinate D-ribonucleotide.                                                                                                   |

|                  |                                                                      |                   |                                                                                                                                      |
|------------------|----------------------------------------------------------------------|-------------------|--------------------------------------------------------------------------------------------------------------------------------------|
|                  |                                                                      | Lreu_0284         | Converts Nicotinate to Nicotinate D-ribonucleoside.                                                                                  |
|                  | Purine-nucleoside phosphorylase (EC:2.4.2.1)                         | Lreu_0114         | Converts N-ribosyl-nicotinamide to Nicotinamide.                                                                                     |
|                  | 5'-nucleotidase (EC:3.1.3.5)                                         | Lreu_1029         | Converts Nicotinate D-ribonucleoside to Nicotinate D-ribonucleotide. Converts Nicotinate D-ribonucleotide to N-ribosyl-nicotinamide. |
|                  | Nicotinamide-nucleotide amidase (EC:3.5.1.42)                        | Lreu_0552         | Converts Nicotinate D-ribonucleotide to Nicotinate D-ribonucleotide.                                                                 |
|                  | Purine nucleosidase (EC:3.2.2.1)                                     | Lreu_1658         | Converts N-Ribosyl-nicotinamide to Nicotinamide.                                                                                     |
|                  | Nicotinate-nucleotide adenylyltransferase (EC:2.7.7.18)              | Lreu_1235         | Converts Nicotinamide D-ribonucleotide to NAD <sup>+</sup> . Converts Nicotinate D-ribonucleotide to deamino-NAD <sup>+</sup> .      |
|                  | NAD <sup>+</sup> Kinase (EC:2.7.1.23)                                | Lreu_0573         | Converts NAD <sup>+</sup> to NADP <sup>+</sup> .                                                                                     |
|                  | NAD <sup>+</sup> synthase (EC:6.3.1.5)                               | Lreu_0285         | Converts Deamino-NAD <sup>+</sup> to NAD <sup>+</sup> .                                                                              |
|                  | Type I pantothenate kinase (EC:2.7.1.33)                             | Lreu_1619         | Converts (R)-Pantothenate to (R)-4'-Phospho-pantothenate.                                                                            |
| Pantothenic acid | Phosphopantothenoylecysteine decarboxylase (EC:6.3.2.5)(EC:4.1.1.36) | Lreu_1174         | Converts (R)-4'-Phospho-pantothenate to (R)-4'-Phospho-pantothenoylecysteine then further to 4'-Phospho-pantetheine.                 |
|                  | Pantetheine-phosphate adenylyltransferase (EC:2.7.7.3)               | Lreu_0641         | Converts 4'-Phospho-pantetheine to Dephospho-CoA.                                                                                    |
|                  | Dephospho-CoA kinase (EC:2.7.1.24)                                   | Lreu_1245<br>CoaC | Converts Dephospho-CoA to Coenzyme-A (CoA).                                                                                          |
|                  | Aspartate kinase (EC:1.2.1.11)                                       | Lreu_0611         | Converts L-Aspartate to L-4-Aspartyl-phosphate                                                                                       |
| Lysine           | Aspartate semialdehyde dehydrogenase (EC:4.3.3.7)                    | Lreu_0618<br>Asd  | Converts L-4-Aspartyl-phosphate to L-4-Aspartyl                                                                                      |

|                   |             |                                                                                   |                                                  |                                                                                                            |
|-------------------|-------------|-----------------------------------------------------------------------------------|--------------------------------------------------|------------------------------------------------------------------------------------------------------------|
|                   |             |                                                                                   |                                                  | phosphate.                                                                                                 |
|                   |             | 4-hydroxy-tetrahydrodipicolinate synthase (EC:4.3.3.7)                            | Lreu_0615<br>DapA                                | Converts L-aspartate 4-semialdehyde to 4-hydroxy-2,3,4,5-tetrahydro-dipicolinate.                          |
|                   |             | Dihydrodipicolinate reductase (EC:1.17.1.8)                                       | Lreu_0616<br>DapB                                | Converts 4-hydroxy-2,3,4,5-tetrahydro-dipicolinate to L-2,3,4,5-tetrahydro-dipicolinate                    |
|                   |             | 2,3,4,5-tetrahydropyridine-2,6-dicarboxylate N-succinyltransferase (EC:2.3.1.117) | Lreu_0613<br>DapD                                | Converts L-2,3,4,5-tetrahydro-dipicolinate to N-succinyl-L-2-amino-6-oxopimelate                           |
|                   |             | Aminotransferase (EC:2.6.1.17)                                                    | DapC                                             | Not currently identified. Converts N-succinyl-L-2-amino-6-oxopimelate to N-succinyl-LL-2,6-diaminopimelate |
|                   |             | Succinyl-diaminopimelate desuccinylase (EC:3.5.1.18)                              | Lreu_0190<br>Lreu_0377<br>Lreu_1544<br>DapE      | Converts N-succinyl-LL-2,6-diaminopimelate to LL-2,6-diaminopimelate                                       |
|                   |             | Diaminopimelate epimerase (EC:5.1.1.7)                                            | Lreu_0610<br>DapF                                | Converts LL-2,5-Diaminopimelate to meso-2,6-diaminopimelate                                                |
|                   |             | Diaminopimelate decarboxylase (EC:4.1.1.20)                                       | Lreu_0612<br>LysA                                | Converts meso-2,6-diaminopimelate to L-lysine                                                              |
|                   |             | Aromatic amino acid aminotransferase apoenzyme (EC:2.6.1-)                        | Lreu_0044<br>Lreu_0617<br>Lreu_0744<br>Lreu_1200 | Converts N-acetyl-L-2-amino-6-oxopimelate to N-acetyl-LL-2,6-diaminopimelate.                              |
|                   |             | N-acetyl diaminopimelate deacetylase                                              | Lreu_0614                                        | Converts N-acetyl-LL-2,6-diaminopimelate to LL-2,6-diaminopimelate.                                        |
| Secretion pathway | Sec pathway | Protein translocase subunit SecE/Sec61 gamma                                      | Lreu_0306                                        | Sec-SRP: general secretory protein pathway. IMP.                                                           |
|                   |             | Preprotein translocase subunit SecG                                               | Lreu_0392                                        |                                                                                                            |
|                   |             | Preprotein translocase subunit SecY                                               | Lreu_1463                                        |                                                                                                            |
|                   |             | Preprotein translocase subunit YajC                                               | Lreu_0530                                        |                                                                                                            |
|                   |             | YidC/Oxa1 family membrane protein insertase                                       | Lreu_1223<br>Lreu_1942                           |                                                                                                            |

|            |      |                                                                 |           |                                                         |
|------------|------|-----------------------------------------------------------------|-----------|---------------------------------------------------------|
|            |      | Protein translocase subunit SecA                                | Lreu_0365 | ATPase.                                                 |
|            |      | Fused signal recognition peptide FtsY                           | Lreu_1157 | SRP receptor.                                           |
|            |      | Signal recognition particle subunit SRP54<br>(EC:3.6.5.4) - Ffh | Lreu_1155 | Targeting protein.                                      |
|            |      | YlxM/p13 family protein                                         | Lreu_1156 | Potentially regulatory.                                 |
| GABA shunt | TCA  | Fumarate reductase flavoprotein subunit                         | Lreu_1530 | Converts succinate to fumarate.                         |
|            |      | Fumarate hydratase                                              | Lreu_1531 | Converts fumarate to malate.                            |
|            | GABA | Succinate-semialdehyde dehydrogenase                            | Lreu_0034 | Converts L-glutamate to 4-aminobutanoate (GABA).        |
|            |      | 4-aminobutyrate aminotransferase                                | Lreu_0199 | Converts 4-aminobutanoate (GABA) to succinate aldehyde. |

**Table S2.** Results from a phage display screening showing extracellular and transmembrane proteins. Adapted from Wall et al., 2003 [59] to include the likely identification of these genes (Likely Name/Function) on the current genome assembly using Blast Sequence Similarity Search. The E-value score is the number of hits similar to the query that could be due to chance. The bit-score is the result of a formula that aligns the possible residue pairs and reports a score.

| Gene Name | Actual Identification | Likely Name/Function                                             | Accension Number and Proposed Name/Function (Wall et al., 2003)  | E-value and bits                                                  |
|-----------|-----------------------|------------------------------------------------------------------|------------------------------------------------------------------|-------------------------------------------------------------------|
| Transport |                       |                                                                  |                                                                  |                                                                   |
| 01        | Lreu_0098             | Amino acid ABC transporter membrane protein                      | AY268984 - Putative glutamine ABC transporter                    | 281 bits, 100% identity, 2e-94 e-val                              |
| 02        | Lreu_1419             | Hypothetical protein                                             | AY268987 - Putative ABC transporter                              | 125 bits, 100% identity, 8e-38 e-val                              |
| 03        | Lreu_1568             | Phosphate ABC transporter substrate-binding protein, PhoT family | AY268991 - Putative phosphate ABC transporter                    | 390 bits, 99% identity (query - L, subject, Q (aa), 5e-139 e-val  |
| 04        | Lreu_1691             | ABC transporter related                                          | AY268996 - Putative ABC transporter                              | 87 bits, 100% similarity, 4e-23 eval                              |
| 05        | -                     | -                                                                | No close similarities.<br>Putative iron chelatin ABC transporter | Closest was 1840 - glycerol 2-dehydrogenase at only 31% identity. |
| 06        | Lreu_1508             | ABC transporter                                                  | Putative ABC transporter ATP-binding protein CydC                | 115 bits, 100% identity, 4e-33 e-val                              |
| Enzyme    |                       |                                                                  |                                                                  |                                                                   |
| 07        | Lreu_1842             | D-Ala-D-Ala carboxypeptidase A                                   | Putative D-alanyl-D-alanine carboxypeptidase                     | 317 bits, 100% identity, 2e-109, e-val                            |
| 08        | Lreu_1403             | N-acetylmuramoyl-L-alanine amidase                               | Putative autolysin                                               | 316 bits, 100% identity, 3e-100 e-val                             |
| 09        | Lreu_1841             | Protein of unknown function DUF915, hydrolase family protein     | Putative cell surface hydrolase                                  | 476 bits, 100% identity, 3e-172 e-val                             |
| 10        | Lreu_1812             | Mannosyl-glycoprotein endo-beta-N-acetylglucosaminidase          | Autolysin like protein                                           | 409 bits, 100% identity, 1e-147 e-val                             |
| 11        | Lreu_0642             | Secreted protein containing a PDZ domain-like                    | Putative endopeptidase                                           | 330 bits, 100% identity, 3e-115 e-val                             |
| 12        | Lreu_1314             | Peptidoglycan binding LysM                                       | Putative endolysin                                               | 339 bits, 100% identity, 1e-119 e-val                             |

|                                      |                        |                                                            |                                                              |                                                                                                                               |
|--------------------------------------|------------------------|------------------------------------------------------------|--------------------------------------------------------------|-------------------------------------------------------------------------------------------------------------------------------|
| 13                                   | Lreu_0937              | Protein of unknown function DUF915 - hydrolase/endolysin   | Putative cell surface hydrolase                              | 343 bits, 100% identity, 6e-121 e-val                                                                                         |
| 14                                   | Lreu_1924              | Beta-lactamase                                             | Putative Penicillin-binding protein class C fnt-like protein | 351 bits, 97% identity (differences in a few aa), 3e-123 e-val                                                                |
| 15                                   | Lreu_1853              | Mannosyl-glycoprotein endo-beta-N-acetylglucosaminidase    | Putative muramidase                                          | 656 bits, 100% identity, 0.0 e-val                                                                                            |
| 16                                   | Lreu_1312              | Peptidoglycan binding LysM                                 | Cell-wall hydrolase LytN-like protein                        | 34 bits, 100% identity, 4e-118 e-val                                                                                          |
| 17                                   | Lreu_1265              | PpiC-type peptidyl-prolyl cis-trans isomerase              | Putative peptidylprolyl isomerase                            | 261 bits, 100% identity, 3e-89 e-val                                                                                          |
| Host/ Microbial Interaction Proteins |                        |                                                            |                                                              |                                                                                                                               |
| 18                                   | Lreu_0415              | Peptidoglycan-binding LysM                                 | Apf1-like protein                                            | 394 bits, 100% identity, 7e-142 e-val                                                                                         |
| Cnb                                  | Lreu_0296              | ABC transporter substrate-binding protein (Likely MapA)    | L. reuteri Cnb gene                                          | 530 bits, 100% identity, 0.0 e-val                                                                                            |
| 19                                   | Lreu_0859              | N-acetylmuramoyl-L-alanine amidase                         | PspC-like protein                                            | 416 bites, 99% identity, 4e-157 e-val                                                                                         |
| Sensor- regulator proteins           |                        |                                                            |                                                              |                                                                                                                               |
| 20                                   | Lreu_0020              | Pas/Pac sensor signal transduction histidine kinase        | Putative histidine protein kinase sensor protein             | 209 bits, 100% identity, 3e-66 e-val                                                                                          |
| 21                                   | Lreu_1259 or Lreu_0095 | YSIRK Gram-positive signal peptide or pseudogene           | putative extracellular protein                               | 68.2 bits, 45% identity and 4e-15 e-val.<br><br>0095 - listed as pseudogene and no match in blast even with its own sequence. |
| 22                                   | Lreu_1816              | NLP/P60 Protein                                            | Putative LysM domain containing protein                      | 198 bits, 98% identity, 9e-64 e-val                                                                                           |
| 23                                   | Lreu_1844              | ErfK/YbiS/YcfS/Ynh G family protein                        | Hypothetical cell surface protein                            | 251 bits, 100% identity, 1e-86 e-val                                                                                          |
| 24                                   | Lreu_1901              | Protein of unknown function DUF1002/ Extracellular protein | Extracellular protein                                        | 505 bits, 100% identity, 0.0 e-val                                                                                            |
| 26                                   | Lreu_0021              | YycH protein                                               | putative extracellular protein                               | 374 bits, 98% identity, 1e-130 e-val                                                                                          |

# Unconserved hypothetical proteins

|    |           |                                                 |                                    |                                      |
|----|-----------|-------------------------------------------------|------------------------------------|--------------------------------------|
| 27 | Lreu_1088 | Hypothetical protein                            | Hypothetical extracellular protein | 104 bits, 100% identity, 4e-31 e-val |
| 28 | Lreu_0028 | Hypothetical protein                            | Hypothetical extracellular protein | 152 bits, 100% identity, 1e-50 e-val |
| 29 | Lreu_1364 | NLP/P60 Protein                                 | Hypothetical extracellular protein | 241 bits, 100% identity, 1e-79 e-val |
| 30 | Lreu_1642 | Hypothetical protein                            | hypothetical extracellular protein | 88.2 bits, 93% identity, 2e-23 e-val |
| 31 | Lreu_1587 | Peptidase m10A and M12B, matrixin and adamlysin | Hypothetical extracellular protein | 313 bits, 99% identity, 2e-110       |
| 32 | Lreu_0046 | Hypothetical protein                            | Hypothetical extracellular protein | 673 bits, 100% identity, 0.0 e-val   |
| 33 | Lreu_0959 | LPXTG-Motif cell wall anchor domain             | Hypothetical extracellular protein | 481 bits, 99% identity, 4e-174 e-val |
| 34 | Lreu_1357 | Pseudogene                                      | Hypothetical extracellular protein | 100% identity                        |
| 35 | Lreu_1141 | Hypothetical protein                            | Hypothetical extracellular protein | 276 bits, 98% identity, 5e-97 e-val  |
| 36 | Lreu_1094 | N-acetylmuramoyl-L-alanine amidase, family 2    | Hypothetical extracellular protein | 174 bits, 100% identity, 7e-55 e-val |

# Transport proteins

|    |           |                                                               |                                                      |                                       |
|----|-----------|---------------------------------------------------------------|------------------------------------------------------|---------------------------------------|
| 37 | Lreu_1558 | H <sup>+</sup> - transporting two sector ATPase               | putative sodium ATP synthase subunit                 | 360 bits, 99% identity and 2e-125     |
| 38 | Lreu_1067 | cation:H <sup>+</sup> antiporter 2, CPA2 family               | putative Na(+)/H(+) antiporter (                     | 221 vits, 100% identity, 7e-71        |
| 39 | Lreu_0180 | heavy metal translocating P-type ATPase                       | putative cadmium-/zinc-/cobalt-transporting ATPase   | 570 bits, 99% identity, 0.0 e-val     |
| 40 | Lreu_1764 | Major facilitator superfamily MFS_1                           | putative transport protein                           | 172 bits, 100% identity, 3e-54 e-val  |
| 41 | Lreu_1681 | branched-chain amino acid transport system II carrier protein | putative branched-chain amino acid transport protein | 326 bits, 100% identity, 9e-112 e-val |
| 42 | Lreu_1599 | Putative hydroxymethylpyr imidine transporter CytX            | putative permease                                    | 320 bits, 100% identity, 9e-111 e-val |
| 43 | Lreu_0161 | Major facilitator superfamily MFS_1                           | putative transmembrane transport protein             | 315 bits, 97% identity, 6e-108        |



|                                   |           |                                                                                       |                                                                                    |                                          |
|-----------------------------------|-----------|---------------------------------------------------------------------------------------|------------------------------------------------------------------------------------|------------------------------------------|
| 44                                | Lreu_1672 | Major facilitator<br>superfamily<br>MFS_1                                             | hypothetical transport protein                                                     | 194 bits, 100%<br>identity, 8e-63 e-val  |
| 45                                | Lreu_0385 | Serine/ threonine<br>exchange<br>transporter                                          | putative amino acid transport<br>protein                                           | 526 bits, 99% identity,<br>0.0 e-val     |
| 46                                | Lreu_1861 | Mn2+/Fe2+<br>transporter,<br>NRAMp family                                             | putative manganese transport<br>protein                                            | 211bits, 100%<br>identity, 8e-68 e-val   |
| 47                                | Lreu_1861 | Mn2+/Fe2+<br>transporter,<br>NRAMp family                                             | putative manganese transport<br>protein                                            | 262 bits, 100%<br>identity, 7e-87 e-val  |
| Enzymes                           |           |                                                                                       |                                                                                    |                                          |
| 48                                | Lreu_1373 | Hypothetical<br>protein                                                               | Eps4N-like protein                                                                 | 698 bits, 99% identity,<br>0.0 e-val     |
| 49                                | Lreu_0588 | Phospho-N-<br>acetylmyramoyl-<br>pentapeptide<br>transferase                          | putative phospho-N-<br>acetylmuramoyl-pentapeptide-<br>transferase                 | 144 bits, 97% identity,<br>2e-44 e-val   |
| 50                                | Lreu_0521 | CDP-<br>diacylglycerol-<br>glycerol-3-<br>phosphate 3-<br>phosphatidyltransf<br>erase | putative CDP-diacylglycerol-<br>glycerol-3-phosphate 3-<br>phosphatidyltransferase | 278 bites, 100%<br>identity, 3e-97 e-val |
| 51                                | Lreu_1709 | Cobalamin<br>biosynthesis<br>protein CbiM                                             | putative cobalamin biosynthesis<br>protein                                         | 156 bits, 100%<br>identity, 6e-50 e-val  |
| Conserved hypothetical proteins   |           |                                                                                       |                                                                                    |                                          |
| 52                                | Lreu_0905 | LrgA family<br>protein                                                                | putative membrane protein                                                          | 159 bits, 100%<br>identity, 3e-52 e-val  |
| Unconserved hypothetical proteins |           |                                                                                       |                                                                                    |                                          |
| 53                                | Lreu_0170 | Hypothetical<br>protein                                                               | Hypothetical membrane protein                                                      | 180 bits, 100%<br>identity, 2e-60 e-val  |
